# Supplementary material
Source: PubMed Central journal article supplement (PMC7977757)
Supplement: ryct200406suppa1.pdf [file ryct200406suppa1.pdf]

## Appendix

### Links to Original Histology Sections and Chest CTs of All Patients

Anonymized, zoomable high-resolution scans of the histology sections of each patient, as well as the corresponding transverse chest CT series in lung kernel reconstruction, can be found following the links provided below.

Abbreviations: LLL = left lower lobe, LUL = left upper lobe, ML = middle lobe, RLL = right lower lobe, RUL = right upper lobe

#### Patient 1

|     |                                                                                                                                                                                                                                                                                                                                                                                                                                                       |
|-----|-------------------------------------------------------------------------------------------------------------------------------------------------------------------------------------------------------------------------------------------------------------------------------------------------------------------------------------------------------------------------------------------------------------------------------------------------------|
| RUL | <a href="https://ictvslidewp01.usb.ch/OlyViaWeb/Html5Viewer?dbId=798403c7-6d3e-4d97-a412-5bc0acd1705f&amp;recordId=42991&amp;layerId=10001&amp;x=222&amp;y=0&amp;scale=3.552912019826518&amp;angle=0&amp;vw=1540&amp;vh=868">https://ictvslidewp01.usb.ch/OlyViaWeb/Html5Viewer?dbId=798403c7-6d3e-4d97-a412-5bc0acd1705f&amp;recordId=42991&amp;layerId=10001&amp;x=222&amp;y=0&amp;scale=3.552912019826518&amp;angle=0&amp;vw=1540&amp;vh=868</a>   |
| ML  | <a href="https://ictvslidewp01.usb.ch/OlyViaWeb/Html5Viewer?dbId=798403c7-6d3e-4d97-a412-5bc0acd1705f&amp;recordId=44132&amp;layerId=10001&amp;x=155&amp;y=0&amp;scale=3.7454468838228476&amp;angle=0&amp;vw=1540&amp;vh=868">https://ictvslidewp01.usb.ch/OlyViaWeb/Html5Viewer?dbId=798403c7-6d3e-4d97-a412-5bc0acd1705f&amp;recordId=44132&amp;layerId=10001&amp;x=155&amp;y=0&amp;scale=3.7454468838228476&amp;angle=0&amp;vw=1540&amp;vh=868</a> |
| RLL | <a href="https://ictvslidewp01.usb.ch/OlyViaWeb/Html5Viewer?dbId=798403c7-6d3e-4d97-a412-5bc0acd1705f&amp;recordId=42996&amp;layerId=10001&amp;x=176&amp;y=0&amp;scale=3.67738785775277&amp;angle=0&amp;vw=1540&amp;vh=868">https://ictvslidewp01.usb.ch/OlyViaWeb/Html5Viewer?dbId=798403c7-6d3e-4d97-a412-5bc0acd1705f&amp;recordId=42996&amp;layerId=10001&amp;x=176&amp;y=0&amp;scale=3.67738785775277&amp;angle=0&amp;vw=1540&amp;vh=868</a>     |
| LUL | <a href="https://ictvslidewp01.usb.ch/OlyViaWeb/Html5Viewer?dbId=798403c7-6d3e-4d97-a412-5bc0acd1705f&amp;recordId=43001&amp;layerId=10001&amp;x=174&amp;y=0&amp;scale=3.643679951463077&amp;angle=0&amp;vw=1540&amp;vh=868">https://ictvslidewp01.usb.ch/OlyViaWeb/Html5Viewer?dbId=798403c7-6d3e-4d97-a412-5bc0acd1705f&amp;recordId=43001&amp;layerId=10001&amp;x=174&amp;y=0&amp;scale=3.643679951463077&amp;angle=0&amp;vw=1540&amp;vh=868</a>   |
| LLL | <a href="https://ictvslidewp01.usb.ch/OlyViaWeb/Html5Viewer?dbId=798403c7-6d3e-4d97-a412-5bc0acd1705f&amp;recordId=43006&amp;layerId=10001&amp;x=257&amp;y=0&amp;scale=3.462909861613265&amp;angle=0&amp;vw=1540&amp;vh=868">https://ictvslidewp01.usb.ch/OlyViaWeb/Html5Viewer?dbId=798403c7-6d3e-4d97-a412-5bc0acd1705f&amp;recordId=43006&amp;layerId=10001&amp;x=257&amp;y=0&amp;scale=3.462909861613265&amp;angle=0&amp;vw=1540&amp;vh=868</a>   |
| CT  | <a href="https://www.rapmed.net/#/publications/1/36927fad-e0f3-4d07-a0f7-4ff8e1e4f177">https://www.rapmed.net/#/publications/1/36927fad-e0f3-4d07-a0f7-4ff8e1e4f177</a>                                                                                                                                                                                                                                                                               |

#### Patient 2

|     |                                                                                                                                                                                                                                                                                                                                                                                                                                                       |
|-----|-------------------------------------------------------------------------------------------------------------------------------------------------------------------------------------------------------------------------------------------------------------------------------------------------------------------------------------------------------------------------------------------------------------------------------------------------------|
| RUL | <a href="https://ictvslidewp01.usb.ch/OlyViaWeb/Html5Viewer?dbId=798403c7-6d3e-4d97-a412-5bc0acd1705f&amp;recordId=43141&amp;layerId=10001&amp;x=193&amp;y=0&amp;scale=4.0836174181514115&amp;angle=0&amp;vw=1540&amp;vh=868">https://ictvslidewp01.usb.ch/OlyViaWeb/Html5Viewer?dbId=798403c7-6d3e-4d97-a412-5bc0acd1705f&amp;recordId=43141&amp;layerId=10001&amp;x=193&amp;y=0&amp;scale=4.0836174181514115&amp;angle=0&amp;vw=1540&amp;vh=868</a> |
| ML  | <a href="https://ictvslidewp01.usb.ch/OlyViaWeb/Html5Viewer?dbId=798403c7-6d3e-4d97-a412-5bc0acd1705f&amp;recordId=43146&amp;layerId=10001&amp;x=172&amp;y=0&amp;scale=4.637836032726666&amp;angle=0&amp;vw=1540&amp;vh=868">https://ictvslidewp01.usb.ch/OlyViaWeb/Html5Viewer?dbId=798403c7-6d3e-4d97-a412-5bc0acd1705f&amp;recordId=43146&amp;layerId=10001&amp;x=172&amp;y=0&amp;scale=4.637836032726666&amp;angle=0&amp;vw=1540&amp;vh=868</a>   |
| RLL | <a href="https://ictvslidewp01.usb.ch/OlyViaWeb/Html5Viewer?dbId=798403c7-6d3e-4d97-a412-5bc0acd1705f&amp;recordId=44077&amp;layerId=10001&amp;x=292&amp;y=0&amp;scale=2.35746947176337&amp;angle=0&amp;vw=1540&amp;vh=868">https://ictvslidewp01.usb.ch/OlyViaWeb/Html5Viewer?dbId=798403c7-6d3e-4d97-a412-5bc0acd1705f&amp;recordId=44077&amp;layerId=10001&amp;x=292&amp;y=0&amp;scale=2.35746947176337&amp;angle=0&amp;vw=1540&amp;vh=868</a>     |
| LUL | <a href="https://ictvslidewp01.usb.ch/OlyViaWeb/Html5Viewer?dbId=798403c7-6d3e-4d97-a412-5bc0acd1705f&amp;recordId=43156&amp;layerId=10001&amp;x=360&amp;y=0&amp;scale=1.909856636985595&amp;angle=0&amp;vw=1540&amp;vh=868">https://ictvslidewp01.usb.ch/OlyViaWeb/Html5Viewer?dbId=798403c7-6d3e-4d97-a412-5bc0acd1705f&amp;recordId=43156&amp;layerId=10001&amp;x=360&amp;y=0&amp;scale=1.909856636985595&amp;angle=0&amp;vw=1540&amp;vh=868</a>   |
| LLL | <a href="https://ictvslidewp01.usb.ch/OlyViaWeb/Html5Viewer?dbId=798403c7-6d3e-4d97-a412-5bc0acd1705f&amp;recordId=43161&amp;layerId=10001&amp;x=371&amp;y=0&amp;scale=2.358921007654009&amp;angle=0&amp;vw=1540&amp;vh=868">https://ictvslidewp01.usb.ch/OlyViaWeb/Html5Viewer?dbId=798403c7-6d3e-4d97-a412-5bc0acd1705f&amp;recordId=43161&amp;layerId=10001&amp;x=371&amp;y=0&amp;scale=2.358921007654009&amp;angle=0&amp;vw=1540&amp;vh=868</a>   |
| CT  | <a href="https://www.rapmed.net/#/publications/1/df8916bf-ba79-43e6-b889-0337ac37d0bf">https://www.rapmed.net/#/publications/1/df8916bf-ba79-43e6-b889-0337ac37d0bf</a>                                                                                                                                                                                                                                                                               |

#### Patient 3

|     |                                                                                                                                                                                                                                                                                                                                                                                                                                                       |
|-----|-------------------------------------------------------------------------------------------------------------------------------------------------------------------------------------------------------------------------------------------------------------------------------------------------------------------------------------------------------------------------------------------------------------------------------------------------------|
| RUL | <a href="https://ictvslidewp01.usb.ch/OlyViaWeb/Html5Viewer?dbId=798403c7-6d3e-4d97-a412-5bc0acd1705f&amp;recordId=43186&amp;layerId=10001&amp;x=237&amp;y=0&amp;scale=2.2200375654397954&amp;angle=0&amp;vw=1540&amp;vh=868">https://ictvslidewp01.usb.ch/OlyViaWeb/Html5Viewer?dbId=798403c7-6d3e-4d97-a412-5bc0acd1705f&amp;recordId=43186&amp;layerId=10001&amp;x=237&amp;y=0&amp;scale=2.2200375654397954&amp;angle=0&amp;vw=1540&amp;vh=868</a> |
| ML  | <a href="https://ictvslidewp01.usb.ch/OlyViaWeb/Html5Viewer?dbId=798403c7-6d3e-4d97-a412-5bc0acd1705f&amp;recordId=43191&amp;layerId=10001&amp;x=0&amp;y=136&amp;scale=5.160749816734737&amp;angle=0&amp;vw=1540&amp;vh=868">https://ictvslidewp01.usb.ch/OlyViaWeb/Html5Viewer?dbId=798403c7-6d3e-4d97-a412-5bc0acd1705f&amp;recordId=43191&amp;layerId=10001&amp;x=0&amp;y=136&amp;scale=5.160749816734737&amp;angle=0&amp;vw=1540&amp;vh=868</a>   |
| RLL | <a href="https://ictvslidewp01.usb.ch/OlyViaWeb/Html5Viewer?dbId=798403c7-6d3e-4d97-a412-5bc0acd1705f&amp;recordId=44082&amp;layerId=10001&amp;x=197&amp;y=0&amp;scale=2.412629476015722&amp;angle=0&amp;vw=1540&amp;vh=868">https://ictvslidewp01.usb.ch/OlyViaWeb/Html5Viewer?dbId=798403c7-6d3e-4d97-a412-5bc0acd1705f&amp;recordId=44082&amp;layerId=10001&amp;x=197&amp;y=0&amp;scale=2.412629476015722&amp;angle=0&amp;vw=1540&amp;vh=868</a>   |
| LUL | <a href="https://ictvslidewp01.usb.ch/OlyViaWeb/Html5Viewer?dbId=798403c7-6d3e-4d97-a412-5bc0acd1705f&amp;recordId=43196&amp;layerId=10001&amp;x=323&amp;y=0&amp;scale=1.7722197409557838&amp;angle=0&amp;vw=1540&amp;vh=868">https://ictvslidewp01.usb.ch/OlyViaWeb/Html5Viewer?dbId=798403c7-6d3e-4d97-a412-5bc0acd1705f&amp;recordId=43196&amp;layerId=10001&amp;x=323&amp;y=0&amp;scale=1.7722197409557838&amp;angle=0&amp;vw=1540&amp;vh=868</a> |
| LLL | <a href="https://ictvslidewp01.usb.ch/OlyViaWeb/Html5Viewer?dbId=798403c7-6d3e-4d97-a412-5bc0acd1705f&amp;recordId=43201&amp;layerId=10001&amp;x=310&amp;y=0&amp;scale=2.2897654672107497&amp;angle=0&amp;vw=1540&amp;vh=868">https://ictvslidewp01.usb.ch/OlyViaWeb/Html5Viewer?dbId=798403c7-6d3e-4d97-a412-5bc0acd1705f&amp;recordId=43201&amp;layerId=10001&amp;x=310&amp;y=0&amp;scale=2.2897654672107497&amp;angle=0&amp;vw=1540&amp;vh=868</a> |
| CT  | <a href="https://www.rapmed.net/#/publications/1/af7aca8c-4a8f-4283-9db9-b928e165b6f7">https://www.rapmed.net/#/publications/1/af7aca8c-4a8f-4283-9db9-b928e165b6f7</a>                                                                                                                                                                                                                                                                               |

#### Patient 4

|     |                                                                                                                                                                                                                                                                                                                                                                                                                                                       |
|-----|-------------------------------------------------------------------------------------------------------------------------------------------------------------------------------------------------------------------------------------------------------------------------------------------------------------------------------------------------------------------------------------------------------------------------------------------------------|
| RUL | <a href="https://ictvslidewp01.usb.ch/OlyViaWeb/Html5Viewer?dbId=798403c7-6d3e-4d97-a412-5bc0acd1705f&amp;recordId=43231&amp;layerId=10001&amp;x=376&amp;y=0&amp;scale=1.745271756204838&amp;angle=0&amp;vw=1540&amp;vh=868">https://ictvslidewp01.usb.ch/OlyViaWeb/Html5Viewer?dbId=798403c7-6d3e-4d97-a412-5bc0acd1705f&amp;recordId=43231&amp;layerId=10001&amp;x=376&amp;y=0&amp;scale=1.745271756204838&amp;angle=0&amp;vw=1540&amp;vh=868</a>   |
| ML  | <a href="https://ictvslidewp01.usb.ch/OlyViaWeb/Html5Viewer?dbId=798403c7-6d3e-4d97-a412-5bc0acd1705f&amp;recordId=43236&amp;layerId=10001&amp;x=327&amp;y=0&amp;scale=2.2613598200746976&amp;angle=0&amp;vw=1540&amp;vh=868">https://ictvslidewp01.usb.ch/OlyViaWeb/Html5Viewer?dbId=798403c7-6d3e-4d97-a412-5bc0acd1705f&amp;recordId=43236&amp;layerId=10001&amp;x=327&amp;y=0&amp;scale=2.2613598200746976&amp;angle=0&amp;vw=1540&amp;vh=868</a> |
| RLL | <a href="https://ictvslidewp01.usb.ch/OlyViaWeb/Html5Viewer?dbId=798403c7-6d3e-4d97-a412-5bc0acd1705f&amp;recordId=44087&amp;layerId=10001&amp;x=309&amp;y=0&amp;scale=2.1033859318648655&amp;angle=0&amp;vw=1540&amp;vh=868">https://ictvslidewp01.usb.ch/OlyViaWeb/Html5Viewer?dbId=798403c7-6d3e-4d97-a412-5bc0acd1705f&amp;recordId=44087&amp;layerId=10001&amp;x=309&amp;y=0&amp;scale=2.1033859318648655&amp;angle=0&amp;vw=1540&amp;vh=868</a> |

|     |                                                                                                                                                                                                                                                                                                                                                                                                                                                       |
|-----|-------------------------------------------------------------------------------------------------------------------------------------------------------------------------------------------------------------------------------------------------------------------------------------------------------------------------------------------------------------------------------------------------------------------------------------------------------|
| LUL | <a href="https://ictvslidewp01.usb.ch/OlyViaWeb/Html5Viewer?dbId=798403c7-6d3e-4d97-a412-5bc0acd1705f&amp;recordId=43241&amp;layerId=10001&amp;x=130&amp;y=0&amp;scale=4.283568998255405&amp;angle=0&amp;vw=1540&amp;vh=868">https://ictvslidewp01.usb.ch/OlyViaWeb/Html5Viewer?dbId=798403c7-6d3e-4d97-a412-5bc0acd1705f&amp;recordId=43241&amp;layerId=10001&amp;x=130&amp;y=0&amp;scale=4.283568998255405&amp;angle=0&amp;vw=1540&amp;vh=868</a>   |
| LLL | <a href="https://ictvslidewp01.usb.ch/OlyViaWeb/Html5Viewer?dbId=798403c7-6d3e-4d97-a412-5bc0acd1705f&amp;recordId=43246&amp;layerId=10001&amp;x=307&amp;y=0&amp;scale=2.1629661355163385&amp;angle=0&amp;vw=1540&amp;vh=868">https://ictvslidewp01.usb.ch/OlyViaWeb/Html5Viewer?dbId=798403c7-6d3e-4d97-a412-5bc0acd1705f&amp;recordId=43246&amp;layerId=10001&amp;x=307&amp;y=0&amp;scale=2.1629661355163385&amp;angle=0&amp;vw=1540&amp;vh=868</a> |
| CT  | <a href="https://www.rapmed.net/#/publications/1/b5b8a9c3-2635-4f3e-8a91-c5b4a547a501">https://www.rapmed.net/#/publications/1/b5b8a9c3-2635-4f3e-8a91-c5b4a547a501</a>                                                                                                                                                                                                                                                                               |

### Patient 5

|     |                                                                                                                                                                                                                                                                                                                                                                                                                                                                                                                       |
|-----|-----------------------------------------------------------------------------------------------------------------------------------------------------------------------------------------------------------------------------------------------------------------------------------------------------------------------------------------------------------------------------------------------------------------------------------------------------------------------------------------------------------------------|
| RUL | <a href="https://ictvslidewp01.usb.ch/OlyViaWeb/Html5Viewer?dbId=798403c7-6d3e-4d97-a412-5bc0acd1705f&amp;recordId=43316&amp;layerId=10001&amp;x=303&amp;y=0&amp;scale=1.8485292160255557&amp;angle=0&amp;vw=1540&amp;vh=868">https://ictvslidewp01.usb.ch/OlyViaWeb/Html5Viewer?dbId=798403c7-6d3e-4d97-a412-5bc0acd1705f&amp;recordId=43316&amp;layerId=10001&amp;x=303&amp;y=0&amp;scale=1.8485292160255557&amp;angle=0&amp;vw=1540&amp;vh=868</a>                                                                 |
| ML  | <a href="https://ictvslidewp01.usb.ch/OlyViaWeb/Html5Viewer?dbId=798403c7-6d3e-4d97-a412-5bc0acd1705f&amp;recordId=44092&amp;layerId=10001&amp;x=237.38000000000034&amp;y=-96.60000000000036&amp;scale=2.4970437237638845&amp;angle=0&amp;vw=1540&amp;vh=868">https://ictvslidewp01.usb.ch/OlyViaWeb/Html5Viewer?dbId=798403c7-6d3e-4d97-a412-5bc0acd1705f&amp;recordId=44092&amp;layerId=10001&amp;x=237.38000000000034&amp;y=-96.60000000000036&amp;scale=2.4970437237638845&amp;angle=0&amp;vw=1540&amp;vh=868</a> |
| RLL | <a href="https://ictvslidewp01.usb.ch/OlyViaWeb/Html5Viewer?dbId=798403c7-6d3e-4d97-a412-5bc0acd1705f&amp;recordId=43321&amp;layerId=10001&amp;x=257&amp;y=0&amp;scale=3.4142511427803175&amp;angle=0&amp;vw=1540&amp;vh=868">https://ictvslidewp01.usb.ch/OlyViaWeb/Html5Viewer?dbId=798403c7-6d3e-4d97-a412-5bc0acd1705f&amp;recordId=43321&amp;layerId=10001&amp;x=257&amp;y=0&amp;scale=3.4142511427803175&amp;angle=0&amp;vw=1540&amp;vh=868</a>                                                                 |
| LUL | <a href="https://ictvslidewp01.usb.ch/OlyViaWeb/Html5Viewer?dbId=798403c7-6d3e-4d97-a412-5bc0acd1705f&amp;recordId=43326&amp;layerId=10001&amp;x=332&amp;y=0&amp;scale=2.0007203054094935&amp;angle=0&amp;vw=1540&amp;vh=868">https://ictvslidewp01.usb.ch/OlyViaWeb/Html5Viewer?dbId=798403c7-6d3e-4d97-a412-5bc0acd1705f&amp;recordId=43326&amp;layerId=10001&amp;x=332&amp;y=0&amp;scale=2.0007203054094935&amp;angle=0&amp;vw=1540&amp;vh=868</a>                                                                 |
| LLL | <a href="https://ictvslidewp01.usb.ch/OlyViaWeb/Html5Viewer?dbId=798403c7-6d3e-4d97-a412-5bc0acd1705f&amp;recordId=44097&amp;layerId=10001&amp;x=301&amp;y=0&amp;scale=3.3936543087320072&amp;angle=0&amp;vw=1540&amp;vh=868">https://ictvslidewp01.usb.ch/OlyViaWeb/Html5Viewer?dbId=798403c7-6d3e-4d97-a412-5bc0acd1705f&amp;recordId=44097&amp;layerId=10001&amp;x=301&amp;y=0&amp;scale=3.3936543087320072&amp;angle=0&amp;vw=1540&amp;vh=868</a>                                                                 |
| CT  | <a href="https://www.rapmed.net/#/publications/1/2dbea93a-23bb-424d-8f25-ba773030fe81">https://www.rapmed.net/#/publications/1/2dbea93a-23bb-424d-8f25-ba773030fe81</a>                                                                                                                                                                                                                                                                                                                                               |

### Patient 6

|     |                                                                                                                                                                                                                                                                                                                                                                                                                                                       |
|-----|-------------------------------------------------------------------------------------------------------------------------------------------------------------------------------------------------------------------------------------------------------------------------------------------------------------------------------------------------------------------------------------------------------------------------------------------------------|
| RUL | <a href="https://ictvslidewp01.usb.ch/OlyViaWeb/Html5Viewer?dbId=798403c7-6d3e-4d97-a412-5bc0acd1705f&amp;recordId=43276&amp;layerId=10001&amp;x=360&amp;y=0&amp;scale=2.0380071905495636&amp;angle=0&amp;vw=1540&amp;vh=868">https://ictvslidewp01.usb.ch/OlyViaWeb/Html5Viewer?dbId=798403c7-6d3e-4d97-a412-5bc0acd1705f&amp;recordId=43276&amp;layerId=10001&amp;x=360&amp;y=0&amp;scale=2.0380071905495636&amp;angle=0&amp;vw=1540&amp;vh=868</a> |
| ML  | <a href="https://ictvslidewp01.usb.ch/OlyViaWeb/Html5Viewer?dbId=798403c7-6d3e-4d97-a412-5bc0acd1705f&amp;recordId=44102&amp;layerId=10001&amp;x=372&amp;y=0&amp;scale=1.7969851847059583&amp;angle=0&amp;vw=1540&amp;vh=868">https://ictvslidewp01.usb.ch/OlyViaWeb/Html5Viewer?dbId=798403c7-6d3e-4d97-a412-5bc0acd1705f&amp;recordId=44102&amp;layerId=10001&amp;x=372&amp;y=0&amp;scale=1.7969851847059583&amp;angle=0&amp;vw=1540&amp;vh=868</a> |
| RLL | <a href="https://ictvslidewp01.usb.ch/OlyViaWeb/Html5Viewer?dbId=798403c7-6d3e-4d97-a412-5bc0acd1705f&amp;recordId=44107&amp;layerId=10001&amp;x=235&amp;y=0&amp;scale=2.6065454545454547&amp;angle=0&amp;vw=1540&amp;vh=868">https://ictvslidewp01.usb.ch/OlyViaWeb/Html5Viewer?dbId=798403c7-6d3e-4d97-a412-5bc0acd1705f&amp;recordId=44107&amp;layerId=10001&amp;x=235&amp;y=0&amp;scale=2.6065454545454547&amp;angle=0&amp;vw=1540&amp;vh=868</a> |
| LUL | <a href="https://ictvslidewp01.usb.ch/OlyViaWeb/Html5Viewer?dbId=798403c7-6d3e-4d97-a412-5bc0acd1705f&amp;recordId=43286&amp;layerId=10001&amp;x=378&amp;y=0&amp;scale=1.9438048917036985&amp;angle=0&amp;vw=1540&amp;vh=868">https://ictvslidewp01.usb.ch/OlyViaWeb/Html5Viewer?dbId=798403c7-6d3e-4d97-a412-5bc0acd1705f&amp;recordId=43286&amp;layerId=10001&amp;x=378&amp;y=0&amp;scale=1.9438048917036985&amp;angle=0&amp;vw=1540&amp;vh=868</a> |
| LLL | <a href="https://ictvslidewp01.usb.ch/OlyViaWeb/Html5Viewer?dbId=798403c7-6d3e-4d97-a412-5bc0acd1705f&amp;recordId=43291&amp;layerId=10001&amp;x=314&amp;y=0&amp;scale=2.137601970140065&amp;angle=0&amp;vw=1540&amp;vh=868">https://ictvslidewp01.usb.ch/OlyViaWeb/Html5Viewer?dbId=798403c7-6d3e-4d97-a412-5bc0acd1705f&amp;recordId=43291&amp;layerId=10001&amp;x=314&amp;y=0&amp;scale=2.137601970140065&amp;angle=0&amp;vw=1540&amp;vh=868</a>   |
| CT  | <a href="https://www.rapmed.net/#/publications/1/3a99d3c5-ce74-4c18-b580-3d26bfce455b">https://www.rapmed.net/#/publications/1/3a99d3c5-ce74-4c18-b580-3d26bfce455b</a>                                                                                                                                                                                                                                                                               |

### Patient 7

|     |                                                                                                                                                                                                                                                                                                                                                                                                                                                                                                                       |
|-----|-----------------------------------------------------------------------------------------------------------------------------------------------------------------------------------------------------------------------------------------------------------------------------------------------------------------------------------------------------------------------------------------------------------------------------------------------------------------------------------------------------------------------|
| RUL | <a href="https://ictvslidewp01.usb.ch/OlyViaWeb/Html5Viewer?dbId=798403c7-6d3e-4d97-a412-5bc0acd1705f&amp;recordId=43101&amp;layerId=10001&amp;x=243.13194534000036&amp;y=3.7954978399973242&amp;scale=3.8367206778243527&amp;angle=0&amp;vw=1540&amp;vh=868">https://ictvslidewp01.usb.ch/OlyViaWeb/Html5Viewer?dbId=798403c7-6d3e-4d97-a412-5bc0acd1705f&amp;recordId=43101&amp;layerId=10001&amp;x=243.13194534000036&amp;y=3.7954978399973242&amp;scale=3.8367206778243527&amp;angle=0&amp;vw=1540&amp;vh=868</a> |
| ML  | <a href="https://ictvslidewp01.usb.ch/OlyViaWeb/Html5Viewer?dbId=798403c7-6d3e-4d97-a412-5bc0acd1705f&amp;recordId=43106&amp;layerId=10001&amp;x=178&amp;y=0&amp;scale=3.853362466618111&amp;angle=0&amp;vw=1540&amp;vh=868">https://ictvslidewp01.usb.ch/OlyViaWeb/Html5Viewer?dbId=798403c7-6d3e-4d97-a412-5bc0acd1705f&amp;recordId=43106&amp;layerId=10001&amp;x=178&amp;y=0&amp;scale=3.853362466618111&amp;angle=0&amp;vw=1540&amp;vh=868</a>                                                                   |
| RLL | <a href="https://ictvslidewp01.usb.ch/OlyViaWeb/Html5Viewer?dbId=798403c7-6d3e-4d97-a412-5bc0acd1705f&amp;recordId=44112&amp;layerId=10001&amp;x=303&amp;y=0&amp;scale=1.8356105539676508&amp;angle=0&amp;vw=1540&amp;vh=868">https://ictvslidewp01.usb.ch/OlyViaWeb/Html5Viewer?dbId=798403c7-6d3e-4d97-a412-5bc0acd1705f&amp;recordId=44112&amp;layerId=10001&amp;x=303&amp;y=0&amp;scale=1.8356105539676508&amp;angle=0&amp;vw=1540&amp;vh=868</a>                                                                 |
| LUL | <a href="https://ictvslidewp01.usb.ch/OlyViaWeb/Html5Viewer?dbId=798403c7-6d3e-4d97-a412-5bc0acd1705f&amp;recordId=43111&amp;layerId=10001&amp;x=278&amp;y=0&amp;scale=3.5586874009064555&amp;angle=0&amp;vw=1540&amp;vh=868">https://ictvslidewp01.usb.ch/OlyViaWeb/Html5Viewer?dbId=798403c7-6d3e-4d97-a412-5bc0acd1705f&amp;recordId=43111&amp;layerId=10001&amp;x=278&amp;y=0&amp;scale=3.5586874009064555&amp;angle=0&amp;vw=1540&amp;vh=868</a>                                                                 |
| LLL | <a href="https://ictvslidewp01.usb.ch/OlyViaWeb/Html5Viewer?dbId=798403c7-6d3e-4d97-a412-5bc0acd1705f&amp;recordId=43116&amp;layerId=10001&amp;x=173&amp;y=0&amp;scale=4.351729270298852&amp;angle=0&amp;vw=1540&amp;vh=868">https://ictvslidewp01.usb.ch/OlyViaWeb/Html5Viewer?dbId=798403c7-6d3e-4d97-a412-5bc0acd1705f&amp;recordId=43116&amp;layerId=10001&amp;x=173&amp;y=0&amp;scale=4.351729270298852&amp;angle=0&amp;vw=1540&amp;vh=868</a>                                                                   |
| CT  | <a href="https://www.rapmed.net/#/publications/1/c1e0a57e-cbb2-43a9-b08a-237d2b90968a">https://www.rapmed.net/#/publications/1/c1e0a57e-cbb2-43a9-b08a-237d2b90968a</a>                                                                                                                                                                                                                                                                                                                                               |

### Patient 8

|     |                                                                                                                                                                                                                                                                                                                                                                                                                                                                                                                         |
|-----|-------------------------------------------------------------------------------------------------------------------------------------------------------------------------------------------------------------------------------------------------------------------------------------------------------------------------------------------------------------------------------------------------------------------------------------------------------------------------------------------------------------------------|
| RUL | <a href="https://ictvslidewp01.usb.ch/OlyViaWeb/Html5Viewer?dbId=798403c7-6d3e-4d97-a412-5bc0acd1705f&amp;recordId=44117&amp;layerId=10001&amp;x=-161.22176399999967&amp;y=-344.41785000000254&amp;scale=6.098215044932423&amp;angle=0&amp;vw=1540&amp;vh=868">https://ictvslidewp01.usb.ch/OlyViaWeb/Html5Viewer?dbId=798403c7-6d3e-4d97-a412-5bc0acd1705f&amp;recordId=44117&amp;layerId=10001&amp;x=-161.22176399999967&amp;y=-344.41785000000254&amp;scale=6.098215044932423&amp;angle=0&amp;vw=1540&amp;vh=868</a> |
| ML  | <a href="https://ictvslidewp01.usb.ch/OlyViaWeb/Html5Viewer?dbId=798403c7-6d3e-4d97-a412-5bc0acd1705f&amp;recordId=43066&amp;layerId=10001&amp;x=294&amp;y=0&amp;scale=1.933504459430063&amp;angle=0&amp;vw=1540&amp;vh=868">https://ictvslidewp01.usb.ch/OlyViaWeb/Html5Viewer?dbId=798403c7-6d3e-4d97-a412-5bc0acd1705f&amp;recordId=43066&amp;layerId=10001&amp;x=294&amp;y=0&amp;scale=1.933504459430063&amp;angle=0&amp;vw=1540&amp;vh=868</a>                                                                     |
| RLL | <a href="https://ictvslidewp01.usb.ch/OlyViaWeb/Html5Viewer?dbId=798403c7-6d3e-4d97-a412-5bc0acd1705f&amp;recordId=43071&amp;layerId=10001&amp;x=178&amp;y=0&amp;scale=4.532082398531512&amp;angle=0&amp;vw=1540&amp;vh=868">https://ictvslidewp01.usb.ch/OlyViaWeb/Html5Viewer?dbId=798403c7-6d3e-4d97-a412-5bc0acd1705f&amp;recordId=43071&amp;layerId=10001&amp;x=178&amp;y=0&amp;scale=4.532082398531512&amp;angle=0&amp;vw=1540&amp;vh=868</a>                                                                     |
| LUL | <a href="https://ictvslidewp01.usb.ch/OlyViaWeb/Html5Viewer?dbId=798403c7-6d3e-4d97-a412-5bc0acd1705f&amp;recordId=43076&amp;layerId=10001&amp;x=247&amp;y=0&amp;scale=3.9366125446218984&amp;angle=0&amp;vw=1540&amp;vh=868">https://ictvslidewp01.usb.ch/OlyViaWeb/Html5Viewer?dbId=798403c7-6d3e-4d97-a412-5bc0acd1705f&amp;recordId=43076&amp;layerId=10001&amp;x=247&amp;y=0&amp;scale=3.9366125446218984&amp;angle=0&amp;vw=1540&amp;vh=868</a>                                                                   |
| LLL | <a href="https://ictvslidewp01.usb.ch/OlyViaWeb/Html5Viewer?dbId=798403c7-6d3e-4d97-a412-5bc0acd1705f&amp;recordId=43081&amp;layerId=10001&amp;x=351&amp;y=0&amp;scale=1.7621430440678502&amp;angle=0&amp;vw=1540&amp;vh=868">https://ictvslidewp01.usb.ch/OlyViaWeb/Html5Viewer?dbId=798403c7-6d3e-4d97-a412-5bc0acd1705f&amp;recordId=43081&amp;layerId=10001&amp;x=351&amp;y=0&amp;scale=1.7621430440678502&amp;angle=0&amp;vw=1540&amp;vh=868</a>                                                                   |
| CT  | <a href="https://www.rapmed.net/#/publications/1/8bed006f-4553-46b5-8190-30de51a93b9c">https://www.rapmed.net/#/publications/1/8bed006f-4553-46b5-8190-30de51a93b9c</a>                                                                                                                                                                                                                                                                                                                                                 |

### Patient 9

|     |                                                                                                                                                                                                                                                                                                                                                                                                                                                                                                                     |
|-----|---------------------------------------------------------------------------------------------------------------------------------------------------------------------------------------------------------------------------------------------------------------------------------------------------------------------------------------------------------------------------------------------------------------------------------------------------------------------------------------------------------------------|
| RUL | <a href="https://ictvslidewp01.usb.ch/OlyViaWeb/Html5Viewer?dbId=798403c7-6d3e-4d97-a412-5bc0acd1705f&amp;recordId=43396&amp;layerId=10001&amp;x=-497.1394262643262&amp;y=-732.7189460789357&amp;scale=5.484281098202725&amp;angle=0&amp;vw=1540&amp;vh=868">https://ictvslidewp01.usb.ch/OlyViaWeb/Html5Viewer?dbId=798403c7-6d3e-4d97-a412-5bc0acd1705f&amp;recordId=43396&amp;layerId=10001&amp;x=-497.1394262643262&amp;y=-732.7189460789357&amp;scale=5.484281098202725&amp;angle=0&amp;vw=1540&amp;vh=868</a> |
| ML  | <a href="https://ictvslidewp01.usb.ch/OlyViaWeb/Html5Viewer?dbId=798403c7-6d3e-4d97-a412-5bc0acd1705f&amp;recordId=44122&amp;layerId=10001&amp;x=-355.2830230999998&amp;y=-323.7202363000016&amp;scale=7.340326304529431&amp;angle=0&amp;vw=1540&amp;vh=868">https://ictvslidewp01.usb.ch/OlyViaWeb/Html5Viewer?dbId=798403c7-6d3e-4d97-a412-5bc0acd1705f&amp;recordId=44122&amp;layerId=10001&amp;x=-355.2830230999998&amp;y=-323.7202363000016&amp;scale=7.340326304529431&amp;angle=0&amp;vw=1540&amp;vh=868</a> |
| RLL | <a href="https://ictvslidewp01.usb.ch/OlyViaWeb/Html5Viewer?dbId=798403c7-6d3e-4d97-a412-5bc0acd1705f&amp;recordId=43401&amp;layerId=10001&amp;x=73&amp;y=0&amp;scale=2.9994870548851273&amp;angle=0&amp;vw=1540&amp;vh=868">https://ictvslidewp01.usb.ch/OlyViaWeb/Html5Viewer?dbId=798403c7-6d3e-4d97-a412-5bc0acd1705f&amp;recordId=43401&amp;layerId=10001&amp;x=73&amp;y=0&amp;scale=2.9994870548851273&amp;angle=0&amp;vw=1540&amp;vh=868</a>                                                                 |
| LUL | <a href="https://ictvslidewp01.usb.ch/OlyViaWeb/Html5Viewer?dbId=798403c7-6d3e-4d97-a412-5bc0acd1705f&amp;recordId=43406&amp;layerId=10001&amp;x=325&amp;y=0&amp;scale=2.0649382027692593&amp;angle=0&amp;vw=1540&amp;vh=868">https://ictvslidewp01.usb.ch/OlyViaWeb/Html5Viewer?dbId=798403c7-6d3e-4d97-a412-5bc0acd1705f&amp;recordId=43406&amp;layerId=10001&amp;x=325&amp;y=0&amp;scale=2.0649382027692593&amp;angle=0&amp;vw=1540&amp;vh=868</a>                                                               |
| LLL | <a href="https://ictvslidewp01.usb.ch/OlyViaWeb/Html5Viewer?dbId=798403c7-6d3e-4d97-a412-5bc0acd1705f&amp;recordId=43411&amp;layerId=10001&amp;x=168.3466653500002&amp;y=-413.2478663200002&amp;scale=4.219239299978566&amp;angle=0&amp;vw=1540&amp;vh=868">https://ictvslidewp01.usb.ch/OlyViaWeb/Html5Viewer?dbId=798403c7-6d3e-4d97-a412-5bc0acd1705f&amp;recordId=43411&amp;layerId=10001&amp;x=168.3466653500002&amp;y=-413.2478663200002&amp;scale=4.219239299978566&amp;angle=0&amp;vw=1540&amp;vh=868</a>   |
| CT  | <a href="https://www.rapmed.net/#/publications/1/d001107c-4f17-42ae-bf5b-b646caa699c6">https://www.rapmed.net/#/publications/1/d001107c-4f17-42ae-bf5b-b646caa699c6</a>                                                                                                                                                                                                                                                                                                                                             |

### Patient 10

|     |                                                                                                                                                                                                                                                                                                                                                                                                                                                                                                                 |
|-----|-----------------------------------------------------------------------------------------------------------------------------------------------------------------------------------------------------------------------------------------------------------------------------------------------------------------------------------------------------------------------------------------------------------------------------------------------------------------------------------------------------------------|
| RUL | <a href="https://ictvslidewp01.usb.ch/OlyViaWeb/Html5Viewer?dbId=798403c7-6d3e-4d97-a412-5bc0acd1705f&amp;recordId=44127&amp;layerId=10001&amp;x=510&amp;y=0&amp;scale=1.8843482611534645&amp;angle=0&amp;vw=1540&amp;vh=868">https://ictvslidewp01.usb.ch/OlyViaWeb/Html5Viewer?dbId=798403c7-6d3e-4d97-a412-5bc0acd1705f&amp;recordId=44127&amp;layerId=10001&amp;x=510&amp;y=0&amp;scale=1.8843482611534645&amp;angle=0&amp;vw=1540&amp;vh=868</a>                                                           |
| ML  | <a href="https://ictvslidewp01.usb.ch/OlyViaWeb/Html5Viewer?dbId=798403c7-6d3e-4d97-a412-5bc0acd1705f&amp;recordId=43361&amp;layerId=10001&amp;x=50&amp;y=0&amp;scale=5.200219983384233&amp;angle=0&amp;vw=1540&amp;vh=868">https://ictvslidewp01.usb.ch/OlyViaWeb/Html5Viewer?dbId=798403c7-6d3e-4d97-a412-5bc0acd1705f&amp;recordId=43361&amp;layerId=10001&amp;x=50&amp;y=0&amp;scale=5.200219983384233&amp;angle=0&amp;vw=1540&amp;vh=868</a>                                                               |
| RLL | <a href="https://ictvslidewp01.usb.ch/OlyViaWeb/Html5Viewer?dbId=798403c7-6d3e-4d97-a412-5bc0acd1705f&amp;recordId=43366&amp;layerId=10001&amp;x=423&amp;y=0&amp;scale=1.8330363624364811&amp;angle=0&amp;vw=1540&amp;vh=868">https://ictvslidewp01.usb.ch/OlyViaWeb/Html5Viewer?dbId=798403c7-6d3e-4d97-a412-5bc0acd1705f&amp;recordId=43366&amp;layerId=10001&amp;x=423&amp;y=0&amp;scale=1.8330363624364811&amp;angle=0&amp;vw=1540&amp;vh=868</a>                                                           |
| LUL | <a href="https://ictvslidewp01.usb.ch/OlyViaWeb/Html5Viewer?dbId=798403c7-6d3e-4d97-a412-5bc0acd1705f&amp;recordId=43371&amp;layerId=10001&amp;x=351&amp;y=0&amp;scale=1.7678348382990571&amp;angle=0&amp;vw=1540&amp;vh=868">https://ictvslidewp01.usb.ch/OlyViaWeb/Html5Viewer?dbId=798403c7-6d3e-4d97-a412-5bc0acd1705f&amp;recordId=43371&amp;layerId=10001&amp;x=351&amp;y=0&amp;scale=1.7678348382990571&amp;angle=0&amp;vw=1540&amp;vh=868</a>                                                           |
| LLL | <a href="https://ictvslidewp01.usb.ch/OlyViaWeb/Html5Viewer?dbId=798403c7-6d3e-4d97-a412-5bc0acd1705f&amp;recordId=43376&amp;layerId=10001&amp;x=503.6324670929184&amp;y=32.54261062503866&amp;scale=2.044381604860057&amp;angle=0&amp;vw=1540&amp;vh=868">https://ictvslidewp01.usb.ch/OlyViaWeb/Html5Viewer?dbId=798403c7-6d3e-4d97-a412-5bc0acd1705f&amp;recordId=43376&amp;layerId=10001&amp;x=503.6324670929184&amp;y=32.54261062503866&amp;scale=2.044381604860057&amp;angle=0&amp;vw=1540&amp;vh=868</a> |
| CT  | <a href="https://www.rapmed.net/#/publications/1/cd8b65bb-87d4-4f70-9e04-ab54825dc79e">https://www.rapmed.net/#/publications/1/cd8b65bb-87d4-4f70-9e04-ab54825dc79e</a>                                                                                                                                                                                                                                                                                                                                         |

### Patient 11

|     |                                                                                                                                                                                                                                                                                                                                                                                                                                                       |
|-----|-------------------------------------------------------------------------------------------------------------------------------------------------------------------------------------------------------------------------------------------------------------------------------------------------------------------------------------------------------------------------------------------------------------------------------------------------------|
| RUL | <a href="https://ictvslidewp01.usb.ch/OlyViaWeb/Html5Viewer?dbId=798403c7-6d3e-4d97-a412-5bc0acd1705f&amp;recordId=43757&amp;layerId=10001&amp;x=326&amp;y=0&amp;scale=2.069939450395901&amp;angle=0&amp;vw=1540&amp;vh=868">https://ictvslidewp01.usb.ch/OlyViaWeb/Html5Viewer?dbId=798403c7-6d3e-4d97-a412-5bc0acd1705f&amp;recordId=43757&amp;layerId=10001&amp;x=326&amp;y=0&amp;scale=2.069939450395901&amp;angle=0&amp;vw=1540&amp;vh=868</a>   |
| ML  |                                                                                                                                                                                                                                                                                                                                                                                                                                                       |
| RLL | <a href="https://ictvslidewp01.usb.ch/OlyViaWeb/Html5Viewer?dbId=798403c7-6d3e-4d97-a412-5bc0acd1705f&amp;recordId=43752&amp;layerId=10001&amp;x=250&amp;y=0&amp;scale=3.887609783407397&amp;angle=0&amp;vw=1540&amp;vh=868">https://ictvslidewp01.usb.ch/OlyViaWeb/Html5Viewer?dbId=798403c7-6d3e-4d97-a412-5bc0acd1705f&amp;recordId=43752&amp;layerId=10001&amp;x=250&amp;y=0&amp;scale=3.887609783407397&amp;angle=0&amp;vw=1540&amp;vh=868</a>   |
| LUL | <a href="https://ictvslidewp01.usb.ch/OlyViaWeb/Html5Viewer?dbId=798403c7-6d3e-4d97-a412-5bc0acd1705f&amp;recordId=43762&amp;layerId=10001&amp;x=269&amp;y=0&amp;scale=3.844262791401756&amp;angle=0&amp;vw=1540&amp;vh=868">https://ictvslidewp01.usb.ch/OlyViaWeb/Html5Viewer?dbId=798403c7-6d3e-4d97-a412-5bc0acd1705f&amp;recordId=43762&amp;layerId=10001&amp;x=269&amp;y=0&amp;scale=3.844262791401756&amp;angle=0&amp;vw=1540&amp;vh=868</a>   |
| LLL | <a href="https://ictvslidewp01.usb.ch/OlyViaWeb/Html5Viewer?dbId=798403c7-6d3e-4d97-a412-5bc0acd1705f&amp;recordId=43767&amp;layerId=10001&amp;x=291&amp;y=0&amp;scale=1.8867962978687271&amp;angle=0&amp;vw=1540&amp;vh=868">https://ictvslidewp01.usb.ch/OlyViaWeb/Html5Viewer?dbId=798403c7-6d3e-4d97-a412-5bc0acd1705f&amp;recordId=43767&amp;layerId=10001&amp;x=291&amp;y=0&amp;scale=1.8867962978687271&amp;angle=0&amp;vw=1540&amp;vh=868</a> |
| CT  | <a href="https://www.rapmed.net/#/publications/1/fb61e029-0509-412a-85ee-cc17591b56e8">https://www.rapmed.net/#/publications/1/fb61e029-0509-412a-85ee-cc17591b56e8</a>                                                                                                                                                                                                                                                                               |

### Patient 12

|     |                                                                                                                                                                                                                                                                                                                                                                                                                                                     |
|-----|-----------------------------------------------------------------------------------------------------------------------------------------------------------------------------------------------------------------------------------------------------------------------------------------------------------------------------------------------------------------------------------------------------------------------------------------------------|
| RUL |                                                                                                                                                                                                                                                                                                                                                                                                                                                     |
| ML  |                                                                                                                                                                                                                                                                                                                                                                                                                                                     |
| RLL | <a href="https://ictvslidewp01.usb.ch/OlyViaWeb/Html5Viewer?dbId=798403c7-6d3e-4d97-a412-5bc0acd1705f&amp;recordId=43451&amp;layerId=10001&amp;x=128&amp;y=0&amp;scale=4.465460245370417&amp;angle=0&amp;vw=1540&amp;vh=868">https://ictvslidewp01.usb.ch/OlyViaWeb/Html5Viewer?dbId=798403c7-6d3e-4d97-a412-5bc0acd1705f&amp;recordId=43451&amp;layerId=10001&amp;x=128&amp;y=0&amp;scale=4.465460245370417&amp;angle=0&amp;vw=1540&amp;vh=868</a> |
| LUL | <a href="https://ictvslidewp01.usb.ch/OlyViaWeb/Html5Viewer?dbId=798403c7-6d3e-4d97-a412-5bc0acd1705f&amp;recordId=43451&amp;layerId=10001&amp;x=128&amp;y=0&amp;scale=4.465460245370417&amp;angle=0&amp;vw=1540&amp;vh=868">https://ictvslidewp01.usb.ch/OlyViaWeb/Html5Viewer?dbId=798403c7-6d3e-4d97-a412-5bc0acd1705f&amp;recordId=43451&amp;layerId=10001&amp;x=128&amp;y=0&amp;scale=4.465460245370417&amp;angle=0&amp;vw=1540&amp;vh=868</a> |
| LLL | <a href="https://ictvslidewp01.usb.ch/OlyViaWeb/Html5Viewer?dbId=798403c7-6d3e-4d97-a412-5bc0acd1705f&amp;recordId=43461&amp;layerId=10001&amp;x=274&amp;y=0&amp;scale=2.38006897881365&amp;angle=0&amp;vw=1540&amp;vh=868">https://ictvslidewp01.usb.ch/OlyViaWeb/Html5Viewer?dbId=798403c7-6d3e-4d97-a412-5bc0acd1705f&amp;recordId=43461&amp;layerId=10001&amp;x=274&amp;y=0&amp;scale=2.38006897881365&amp;angle=0&amp;vw=1540&amp;vh=868</a>   |
| CT  | <a href="https://www.rapmed.net/#/publications/1/5377f057-3929-4c76-8191-c8bcce85b574">https://www.rapmed.net/#/publications/1/5377f057-3929-4c76-8191-c8bcce85b574</a>                                                                                                                                                                                                                                                                             |

### Patient 13

|     |                                                                                                                                                                                                                                                                                                                                                                                                                                                       |
|-----|-------------------------------------------------------------------------------------------------------------------------------------------------------------------------------------------------------------------------------------------------------------------------------------------------------------------------------------------------------------------------------------------------------------------------------------------------------|
| RUL | <a href="https://ictvslidewp01.usb.ch/OlyViaWeb/Html5Viewer?dbId=798403c7-6d3e-4d97-a412-5bc0acd1705f&amp;recordId=43577&amp;layerId=10001&amp;x=75&amp;y=0&amp;scale=4.657569850552306&amp;angle=0&amp;vw=1540&amp;vh=868">https://ictvslidewp01.usb.ch/OlyViaWeb/Html5Viewer?dbId=798403c7-6d3e-4d97-a412-5bc0acd1705f&amp;recordId=43577&amp;layerId=10001&amp;x=75&amp;y=0&amp;scale=4.657569850552306&amp;angle=0&amp;vw=1540&amp;vh=868</a>     |
| ML  | <a href="https://ictvslidewp01.usb.ch/OlyViaWeb/Html5Viewer?dbId=798403c7-6d3e-4d97-a412-5bc0acd1705f&amp;recordId=43582&amp;layerId=10001&amp;x=370&amp;y=0&amp;scale=2.150198852365424&amp;angle=0&amp;vw=1540&amp;vh=868">https://ictvslidewp01.usb.ch/OlyViaWeb/Html5Viewer?dbId=798403c7-6d3e-4d97-a412-5bc0acd1705f&amp;recordId=43582&amp;layerId=10001&amp;x=370&amp;y=0&amp;scale=2.150198852365424&amp;angle=0&amp;vw=1540&amp;vh=868</a>   |
| RLL | <a href="https://ictvslidewp01.usb.ch/OlyViaWeb/Html5Viewer?dbId=798403c7-6d3e-4d97-a412-5bc0acd1705f&amp;recordId=43587&amp;layerId=10001&amp;x=290&amp;y=0&amp;scale=2.0610501516514707&amp;angle=0&amp;vw=1540&amp;vh=868">https://ictvslidewp01.usb.ch/OlyViaWeb/Html5Viewer?dbId=798403c7-6d3e-4d97-a412-5bc0acd1705f&amp;recordId=43587&amp;layerId=10001&amp;x=290&amp;y=0&amp;scale=2.0610501516514707&amp;angle=0&amp;vw=1540&amp;vh=868</a> |
| LUL | <a href="https://ictvslidewp01.usb.ch/OlyViaWeb/Html5Viewer?dbId=798403c7-6d3e-4d97-a412-5bc0acd1705f&amp;recordId=43577&amp;layerId=10001&amp;x=75&amp;y=0&amp;scale=4.657569850552306&amp;angle=0&amp;vw=1540&amp;vh=868">https://ictvslidewp01.usb.ch/OlyViaWeb/Html5Viewer?dbId=798403c7-6d3e-4d97-a412-5bc0acd1705f&amp;recordId=43577&amp;layerId=10001&amp;x=75&amp;y=0&amp;scale=4.657569850552306&amp;angle=0&amp;vw=1540&amp;vh=868</a>     |

|     |                                                                                                                                                                         |
|-----|-------------------------------------------------------------------------------------------------------------------------------------------------------------------------|
| LLL |                                                                                                                                                                         |
| CT  | <a href="https://www.rapmed.net/#/publications/1/1144d7b9-ef98-474b-b5d6-9d03d0356610">https://www.rapmed.net/#/publications/1/1144d7b9-ef98-474b-b5d6-9d03d0356610</a> |

### Patient 14

|     |                                                                                                                                                                                                                                                                                                                                                                                                                                                                                                                             |
|-----|-----------------------------------------------------------------------------------------------------------------------------------------------------------------------------------------------------------------------------------------------------------------------------------------------------------------------------------------------------------------------------------------------------------------------------------------------------------------------------------------------------------------------------|
| RUL | <a href="https://ictvsleidwp01.usb.ch/OlyViaWeb/Html5Viewer?dbId=798403c7-6d3e-4d97-a412-5bc0acd1705f&amp;recordId=44012&amp;layerId=1&amp;x=-203.22031778412042&amp;y=-103.65175717648753&amp;scale=3.6296485420715933&amp;angle=0&amp;vw=1540&amp;vh=868">https://ictvsleidwp01.usb.ch/OlyViaWeb/Html5Viewer?dbId=798403c7-6d3e-4d97-a412-5bc0acd1705f&amp;recordId=44012&amp;layerId=1&amp;x=-203.22031778412042&amp;y=-103.65175717648753&amp;scale=3.6296485420715933&amp;angle=0&amp;vw=1540&amp;vh=868</a>           |
| ML  | <a href="https://ictvsleidwp01.usb.ch/OlyViaWeb/Html5Viewer?dbId=798403c7-6d3e-4d97-a412-5bc0acd1705f&amp;recordId=44015&amp;layerId=1&amp;x=1.4210854715202004e-14&amp;y=-1.509903313490213e-14&amp;scale=5.238596203587875&amp;angle=0&amp;vw=1540&amp;vh=868">https://ictvsleidwp01.usb.ch/OlyViaWeb/Html5Viewer?dbId=798403c7-6d3e-4d97-a412-5bc0acd1705f&amp;recordId=44015&amp;layerId=1&amp;x=1.4210854715202004e-14&amp;y=-1.509903313490213e-14&amp;scale=5.238596203587875&amp;angle=0&amp;vw=1540&amp;vh=868</a> |
| RLL | <a href="https://ictvsleidwp01.usb.ch/OlyViaWeb/Html5Viewer?dbId=798403c7-6d3e-4d97-a412-5bc0acd1705f&amp;recordId=44018&amp;layerId=1&amp;x=-713.9564946526316&amp;y=-196.42379742955643&amp;scale=6.6488392172644&amp;angle=0&amp;vw=1540&amp;vh=868">https://ictvsleidwp01.usb.ch/OlyViaWeb/Html5Viewer?dbId=798403c7-6d3e-4d97-a412-5bc0acd1705f&amp;recordId=44018&amp;layerId=1&amp;x=-713.9564946526316&amp;y=-196.42379742955643&amp;scale=6.6488392172644&amp;angle=0&amp;vw=1540&amp;vh=868</a>                   |
| LUL | <a href="https://ictvsleidwp01.usb.ch/OlyViaWeb/Html5Viewer?dbId=798403c7-6d3e-4d97-a412-5bc0acd1705f&amp;recordId=44021&amp;layerId=1&amp;x=-695.6845384719513&amp;y=-149.01635291894945&amp;scale=6.137243011658865&amp;angle=0&amp;vw=1540&amp;vh=868">https://ictvsleidwp01.usb.ch/OlyViaWeb/Html5Viewer?dbId=798403c7-6d3e-4d97-a412-5bc0acd1705f&amp;recordId=44021&amp;layerId=1&amp;x=-695.6845384719513&amp;y=-149.01635291894945&amp;scale=6.137243011658865&amp;angle=0&amp;vw=1540&amp;vh=868</a>               |
| LLL | <a href="https://ictvsleidwp01.usb.ch/OlyViaWeb/Html5Viewer?dbId=798403c7-6d3e-4d97-a412-5bc0acd1705f&amp;recordId=44024&amp;layerId=1&amp;x=-911.4121398571151&amp;y=-105.25892966720812&amp;scale=6.586314360049753&amp;angle=0&amp;vw=1540&amp;vh=868">https://ictvsleidwp01.usb.ch/OlyViaWeb/Html5Viewer?dbId=798403c7-6d3e-4d97-a412-5bc0acd1705f&amp;recordId=44024&amp;layerId=1&amp;x=-911.4121398571151&amp;y=-105.25892966720812&amp;scale=6.586314360049753&amp;angle=0&amp;vw=1540&amp;vh=868</a>               |
| CT  | <a href="https://www.rapmed.net/#/publications/1/8ae9e64f-1d14-4099-ba95-d68b3a5f5053">https://www.rapmed.net/#/publications/1/8ae9e64f-1d14-4099-ba95-d68b3a5f5053</a>                                                                                                                                                                                                                                                                                                                                                     |
